# Supplementary material for: Hyaluronic Acid Oligosaccharides Improve Myocardial Function Reconstruction and Angiogenesis against Myocardial Infarction by Regulation of Macrophages
Source: PubMed Central journal article supplement — Theranostics. 2019 Mar 16;9(7):1980–92. doi: 10.7150/thno.31073 (PMC6485288; doi:10.7150/thno.31073), 2019-03-16
Supplement: thnov09p1980s1.pdf [file thnov09p1980s1.pdf]

## Supplementary Material

**Figure S1** Histological analysis of hearts harvested 28 days after MI. A) Images from four-treated groups showing morphological changes with H&E staining of heart paraffin sections. B) Images from four-treated groups showing myocardial fibrosis with MT staining of heart paraffin sections. **Figure S2** showed blood chemistry profile analysis and complete blood count (CBC) after treatment with different formulations. **Figure S3** displayed histological analysis of H&E staining of main organs paraffin sections for safety evaluation. **Figure S4** IHC analysis of expression of A) CD31 and B) Ki-67 in heart sections of different groups after treated for 28 days. **Figure S5** Immunostaining of M2 macrophages in heart sections. A) Sham group; B) NS group; C) h-HA group and D) o-HA group. E) CD206<sup>+</sup> M2 macrophage in heart tissues. (P<0.001)
